# Supplementary material
Source: PubMed Central journal article supplement (PMC6175041)
Supplement: NIHMS79654-supplement-Supplementary_Table_1.pdf [file NIHMS79654-supplement-Supplementary_Table_1.pdf]

| Supplementary Table 1. Association between genotype and toxicity $\geq$ G3 |                    |                    |                    |                    |                      |                    |                    |                    |                      |                  |                    |                   |
|----------------------------------------------------------------------------|--------------------|--------------------|--------------------|--------------------|----------------------|--------------------|--------------------|--------------------|----------------------|------------------|--------------------|-------------------|
| TS                                                                         |                    |                    |                    |                    |                      |                    |                    |                    |                      |                  |                    |                   |
| TS                                                                         | N&V                |                    | Diarrhoea          |                    | Stomatitis           |                    | Granulocytes       |                    | Haemaglobin          |                  | Neuro              |                   |
|                                                                            | No                 | Yes                | No                 | Yes                | No                   | Yes                | No                 | Yes                | No                   | Yes              | No                 | Yes               |
| 2R/2R                                                                      | 30                 | 7                  | 36                 | 1                  | 36                   | 1                  | 22                 | 14                 | 37                   | 0                | 36                 | 1                 |
|                                                                            | 81.1%<br>64.8-92.0 | 18.9%<br>8.0-35.1  | 97.3%<br>85.8-99.9 | 2.7%<br>0.07-14.16 | 97.3%<br>85.84-99.93 | 2.7%<br>0.06-14.16 | 61.1%<br>43.5-76.9 | 38.9%<br>23.1-56.5 | 100%<br>90.5-100     | 0%<br>0.0-9.5    | 97.3%<br>85.8-99.9 | 2.7%<br>0.07-14.2 |
| 2R/3R                                                                      | 39                 | 9                  | 46                 | 3                  | 44                   | 4                  | 32                 | 15                 | 47                   | 2                | 42                 | 6                 |
|                                                                            | 81.3%<br>67.4-91.1 | 18.8%<br>8.9-32.6  | 93.9%<br>83.1-98.7 | 6.1%<br>1.28-16.87 | 91.7%<br>80.02-97.68 | 8.3%<br>2.32-19.98 | 68.1%<br>52.9-80.9 | 31.9%<br>19.1-47.1 | 95.9%<br>86.0-99.5   | 4.1%<br>0.5-14.0 | 87.5%<br>74.8-95.3 | 12.5%<br>4.7-25.2 |
| 3R/3R                                                                      | 32                 | 3                  | 34                 | 1                  | 35                   | 0                  | 19                 | 13                 | 32                   | 3                | 34                 | 1                 |
|                                                                            | 91.4%<br>76.9-98.2 | 8.6%<br>1.8-23.1   | 97.1%<br>85.1-99.9 | 2.9%<br>0.07-14.92 | 100%<br>90.0-100.0   | 0%<br>0-0.1        | 59.4%<br>40.6-76.3 | 40.6%<br>23.7-59.4 | 91.4%<br>76.9-98.2   | 8.6%<br>1.8-23.1 | 97.1%<br>85.1-99.9 | 2.9%<br>0.07-14.9 |
|                                                                            | p=0.377            |                    | p=0.732            |                    | p=0.186              |                    | p=0.711            |                    | p=0.185              |                  | p=0.188            |                   |
| 2R/2R                                                                      | 30                 | 7                  | 36                 | 1                  | 36                   | 1                  | 22                 | 14                 | 37                   | 0                | 36                 | 1                 |
|                                                                            | 81.1%<br>64.8-92.0 | 18.9%<br>8.0-35.1  | 97.3%<br>85.8-99.9 | 2.7%<br>0.07-14.16 | 97.3%<br>85.84-99.93 | 2.7%<br>0.06-14.16 | 61.1%<br>43.5-76.9 | 38.9%<br>23.1-56.5 | 100.0%<br>90.5-100   | 0.0%<br>0-9.5    | 97.3%<br>85.8-99.9 | 2.7%<br>0.06-14.2 |
| 2R/3R/3R/3R                                                                | 71                 | 12                 | 80                 | 4                  | 79                   | 4                  | 51                 | 28                 | 79                   | 5                | 76                 | 7                 |
|                                                                            | 85.5%<br>76.1-92.3 | 14.5%<br>7.7-23.9  | 95.2%<br>88.3-98.7 | 4.8%<br>1.3-11.7   | 95.2%<br>88.1-98.7   | 4.8%<br>1.3-11.9   | 64.6%<br>53.0-75.0 | 35.4%<br>23.1-56.5 | 94.0%<br>86.7-98.0   | 6.0%<br>2.0-13.3 | 91.6%<br>83.4-96.5 | 8.4%<br>3.5-16.6  |
|                                                                            | p=0.592            |                    | p=1.0              |                    | p=1.0                |                    | p=0.835            |                    | p=0.322              |                  | p=0.432            |                   |
| GSTP1 rs1695                                                               |                    |                    |                    |                    |                      |                    |                    |                    |                      |                  |                    |                   |
|                                                                            | N&V                |                    | Diarrhoea          |                    | Stomatitis           |                    | Granulocytes       |                    | Haemaglobin          |                  | Neuro              |                   |
|                                                                            | No                 | Yes                | No                 | Yes                | No                   | Yes                | No                 | Yes                | No                   | Yes              | No                 | yes               |
| A                                                                          | 59                 | 13                 | 69                 | 3                  | 70                   | 2                  | 44                 | 22                 | 69                   | 3                | 67                 | 5                 |
|                                                                            | 81.9%<br>71.1-90.0 | 18.1%<br>10.0-28.9 | 95.8%<br>88.3-99.1 | 4.2%<br>0.9-11.7   | 97.2%<br>90.3-99.7   | 2.8%<br>0.3-9.7    | 66.7%<br>54.0-77.8 | 33.3%<br>22.2-46.0 | 95.8%<br>88.3-99.1   | 4.2%<br>0.9-11.7 | 93.1%<br>84.5-97.7 | 6.9%<br>2.3-15.5  |
| AG                                                                         | 45                 | 6                  | 50                 | 2                  | 48                   | 3                  | 31                 | 21                 | 48                   | 4                | 47                 | 4                 |
|                                                                            | 88.2%<br>76.1-95.6 | 11.8%<br>4.4-23.9  | 96.2%<br>86.8-99.5 | 3.8%<br>0.5-13.2   | 94.1%<br>83.8-98.8   | 5.9%<br>1.2-16.2   | 59.6%<br>45.1-73.0 | 40.4%<br>27.0-55.0 | 92.3%<br>81.5-97.9   | 7.7%<br>2.1-18.5 | 92.2%<br>81.1-97.8 | 7.8%<br>2.2-18.9  |
| G                                                                          | 5                  | 1                  | 6                  | 0                  | 6                    | 0                  | 79                 | 45                 | 6                    | 0                | 6                  | 0                 |
|                                                                            | 83.3%<br>35.9-99.6 | 16.7%<br>0.4-64.1  | 100.0%<br>54.1-100 | 0.0%<br>0-45.9     | 100.0%<br>54.1-100   | 0.0%<br>0-45.9     | 66.7%<br>22.3-95.7 | 33.3%<br>4.3-77.7  | 100.0%<br>54.1-100.0 | 0.0%<br>0.0-45.9 | 100.0%<br>54.1-100 | 0.0%<br>0.0-45.9  |
|                                                                            | p=0.582            |                    | p=1.0              |                    | p=0.724              |                    | p=0.740            |                    | p=0.609              |                  | p=1.0              |                   |

| OPRT              |                           |                          |                             |                                |                            |                         |                           |                            |                            |                           |                            |                          |
|-------------------|---------------------------|--------------------------|-----------------------------|--------------------------------|----------------------------|-------------------------|---------------------------|----------------------------|----------------------------|---------------------------|----------------------------|--------------------------|
|                   | N&V                       |                          | Diarrhoea                   |                                | Stomatitis                 |                         | Granulocytes              |                            | Haemaglobin                |                           | Neuro                      |                          |
|                   | No                        | Yes                      | No                          | Yes                            | No                         | Yes                     | No                        | Yes                        | No                         | Yes                       | No                         | Yes                      |
| <b>C</b>          | <u>3</u>                  | <u>2</u>                 | <u>4</u>                    | <u>1</u>                       | <u>5</u>                   | <u>0</u>                | <u>2</u>                  | <u>3</u>                   | <u>5</u>                   | <u>0</u>                  | <u>4</u>                   | <u>1</u>                 |
|                   | 60%<br><u>14.7-94.7</u>   | 40%<br><u>5.3-85.3</u>   | 80%<br><u>28.4-99.5</u>     | 20%<br><u>20.0</u><br>0.5-71.6 | 100%<br><u>47.8-100.0</u>  | 0%<br><u>0.0-52.18</u>  | 40%<br><u>5.3-85.3</u>    | 60%<br><u>14.7-94.7</u>    | 100%<br><u>47.8-100.0</u>  | 0%<br><u>0.0-52.18</u>    | 80%<br><u>28.4-99.5</u>    | 20%<br><u>0.5-71.6</u>   |
| <b>GC</b>         | <u>30</u>                 | <u>5</u>                 | <u>33</u>                   | <u>2</u>                       | <u>33</u>                  | <u>2</u>                | <u>24</u>                 | <u>9</u>                   | <u>34</u>                  | <u>1</u>                  | <u>34</u>                  | <u>1</u>                 |
|                   | 85.7%<br><u>69.7-95.2</u> | 14.3%<br><u>4.8-30.3</u> | 94.3%<br><u>80.8-99.3</u>   | 5.7%<br><u>0.7-19.2</u>        | 94.3%<br><u>80.8-99.3</u>  | 5.7%<br><u>0.7-19.2</u> | 72.7%<br><u>54.5-86.7</u> | 27.3%<br><u>13.3-45.5</u>  | 97.1%<br><u>85.1-99.9</u>  | 2.9%<br><u>0.07-14.92</u> | 97.1%<br><u>85.1-99.9</u>  | 2.9%<br><u>0.1-14.9</u>  |
| <b>G</b>          | <u>76</u>                 | <u>13</u>                | <u>88</u>                   | <u>2</u>                       | <u>86</u>                  | <u>3</u>                | <u>53</u>                 | <u>33</u>                  | <u>84</u>                  | <u>6</u>                  | <u>82</u>                  | <u>7</u>                 |
|                   | 85.4%<br><u>76.3-92.0</u> | 14.6%<br><u>8.0-23.7</u> | 97.8%<br><u>92.2-99.7</u>   | 2.2%<br><u>0.3-7.8</u>         | 96.6%<br><u>90.5-99.3</u>  | 3.4%<br><u>0.7-9.5</u>  | 61.6%<br><u>50.5-71.9</u> | 38.4%<br><u>28.1-49.5</u>  | 93.3%<br><u>86.1-97.5</u>  | 6.7%<br><u>2.5-13.9</u>   | 92.1%<br><u>84.5-96.8</u>  | 7.9%<br><u>3.2-15.5</u>  |
|                   | p = 0.283                 |                          | p = 0.082                   |                                | p = 0.690                  |                         | p = 0.303                 |                            | p = 0.752                  |                           | p = 0.237                  |                          |
| DPYD2A IVS14+1G>A |                           |                          |                             |                                |                            |                         |                           |                            |                            |                           |                            |                          |
|                   | N&V                       |                          | Diarrhoea                   |                                | Stomatitis                 |                         | Granulocytes              |                            | Haemaglobin                |                           | Neuro                      |                          |
|                   | No                        | Yes                      | No                          | Yes                            | No                         | Yes                     | No                        | Yes                        | No                         | Yes                       | No                         | Yes                      |
| <b>G</b>          | <u>108</u>                | <u>19</u>                | <u>124</u>                  | <u>4</u>                       | <u>122</u>                 | <u>5</u>                | <u>79</u>                 | <u>41</u>                  | <u>122</u>                 | <u>6</u>                  | <u>118</u>                 | <u>9</u>                 |
|                   | 85.0%<br><u>77.6-90.7</u> | 15.0%<br><u>9.3-22.4</u> | 96.9%<br><u>92.2-99.1</u>   | 3.1%<br><u>3.1%</u>            | 96.1%<br><u>91.1-98.7</u>  | 3.9%<br><u>1.3-8.9</u>  | 64.8%<br><u>55.6-73.2</u> | 35.2%<br><u>26.8-44.4</u>  | 95.3%<br><u>90.1-98.3</u>  | 4.7%<br><u>1.7-9.9</u>    | 92.9%<br><u>87.0-96.7</u>  | 7.1%<br><u>3.3-13.0</u>  |
| <b>GA</b>         | <u>0</u>                  | <u>1</u>                 | <u>0</u>                    | <u>1</u>                       | <u>1</u>                   | <u>0</u>                | <u>0</u>                  | <u>1</u>                   | <u>1</u>                   | <u>0</u>                  | <u>1</u>                   | <u>0</u>                 |
|                   | 0.0%<br><u>0-97.5</u>     | 100.0%<br><u>2.5-1.0</u> | 0.0%<br><u>0.0-97.5</u>     | 100.0%<br><u>2.5-100.0</u>     | 100.0%<br><u>2.5-100.0</u> | 0.0%<br><u>0-97.5</u>   | 0.0%<br><u>0.0-97.5</u>   | 100.0%<br><u>2.5-100.0</u> | 100.0%<br><u>2.5-100.0</u> | 0.0%<br><u>0.0-97.5</u>   | 100.0%<br><u>2.5-100.0</u> | 0.0%<br><u>0.0-97.5</u>  |
|                   | p = 0.156                 |                          | p = 0.039                   |                                | p = 1.0                    |                         | p = 0.358                 |                            | p = 1.0                    |                           | p = 1.0                    |                          |
| DPYD rs1801159    |                           |                          |                             |                                |                            |                         |                           |                            |                            |                           |                            |                          |
|                   | N&V                       |                          | Diarrhoea                   |                                | Stomatitis                 |                         | Granulocytes              |                            | Haemaglobin                |                           | Neuro                      |                          |
|                   | No                        | Yes                      | No                          | Yes                            | No                         | Yes                     | No                        | Yes                        | No                         | Yes                       | No                         | Yes                      |
| <b>A</b>          | <u>78</u>                 | <u>15</u>                | <u>90</u>                   | <u>4</u>                       | <u>91</u>                  | <u>2</u>                | <u>61</u>                 | <u>28</u>                  | <u>90</u>                  | <u>4</u>                  | <u>87</u>                  | <u>6</u>                 |
|                   | 83.9%<br><u>74.8-90.7</u> | 16.1%<br><u>9.3-25.2</u> | 95.7%<br><u>89.5-98.8</u>   | 4.3%<br><u>1.2-10.5</u>        | 97.8%<br><u>92.4-99.7</u>  | 2.2%<br><u>0.3-7.6</u>  | 68.5%<br><u>57.8-78.0</u> | 31.5%<br><u>22.0-42.2</u>  | 95.7%<br><u>89.5-98.8</u>  | 4.3%<br><u>1.2-10.5</u>   | 93.5%<br><u>86.5-97.6</u>  | 6.5%<br><u>2.4-13.5</u>  |
| <b>AG</b>         | <u>23</u>                 | <u>3</u>                 | <u>25</u>                   | <u>1</u>                       | <u>24</u>                  | <u>2</u>                | <u>13</u>                 | <u>12</u>                  | <u>25</u>                  | <u>1</u>                  | <u>24</u>                  | <u>2</u>                 |
|                   | 88.5%<br><u>69.8-97.6</u> | 11.5%<br><u>2.4-30.2</u> | 96.2%<br><u>80.4-99.9</u>   | 3.8%<br><u>0.09-19.6</u>       | 92.3%<br><u>74.9-99.1</u>  | 7.7%<br><u>0.9-25.1</u> | 52.0%<br><u>31.3-72.2</u> | 48.0%<br><u>27.8-68.7</u>  | 96.2%<br><u>80.4-99.9</u>  | 3.8%<br><u>0.09-19.6</u>  | 92.3%<br><u>74.9-99.1</u>  | 7.7%<br><u>0.9-25.1</u>  |
| <b>G</b>          | <u>7</u>                  | <u>2</u>                 | <u>9</u>                    | <u>0</u>                       | <u>123</u>                 | <u>5</u>                | <u>5</u>                  | <u>4</u>                   | <u>8</u>                   | <u>1</u>                  | <u>119</u>                 | <u>9</u>                 |
|                   | 77.8%<br><u>40.0-97.2</u> | 22.2%<br><u>2.8-60.0</u> | 100.0%<br><u>66.3-100.0</u> | 0.0%<br><u>0.0-33.6</u>        | 96.1%<br><u>51.8-99.7</u>  | 3.9%<br><u>0.2-48.2</u> | 55.6%<br><u>21.2-86.3</u> | 44.4%<br><u>13.7-78.8</u>  | 88.9%<br><u>51.8-99.7</u>  | 11.1%<br><u>0.2-48.2</u>  | 88.9%<br><u>51.8-99.7</u>  | 11.1%<br><u>0.2-48.2</u> |
|                   | p = 0.698                 |                          | p = 1.0                     |                                | p = 0.143                  |                         | p = 0.264                 |                            | p = 0.432                  |                           | p = 0.700                  |                          |

| ERCC1 rs11615   |                      |                    |                      |                   |                      |                  |                    |                    |                      |                   |                      |                   |
|-----------------|----------------------|--------------------|----------------------|-------------------|----------------------|------------------|--------------------|--------------------|----------------------|-------------------|----------------------|-------------------|
|                 | N&V                  |                    | Diarrhoea            |                   | Stomatitis           |                  | Granulocytes       |                    | Haemaglobin          |                   | Neuro                |                   |
|                 | No                   | Yes                | No                   | Yes               | No                   | Yes              | No                 | Yes                | No                   | Yes               | No                   | Yes               |
| <b>C</b>        | 16                   | 2                  | 18                   | 1                 | 18                   | 0                | 10                 | 9                  | 16                   | 3                 | 16                   | 2                 |
|                 | 88.9%<br>65.3-98.6   | 11.1%<br>1.4-34.7  | 94.7%<br>74.0-99.9   | 5.3%<br>0.1-26.0  | 100.0%<br>81.5-100   | 0.0%<br>0.0-18.5 | 52.6%<br>28.9-75.6 | 47.4%<br>24.5-71.1 | 84.2%<br>60.4-96.6   | 15.8%<br>3.4-39.6 | 88.9%<br>65.3-98.6   | 11.1%<br>1.4-43.7 |
| <b>CT</b>       | 57                   | 12                 | 65                   | 4                 | 67                   | 2                | 46                 | 19                 | 67                   | 2                 | 65                   | 4                 |
|                 | 82.6%<br>71.6-90.7   | 17.4%<br>9.3-28.4  | 94.2%<br>85.8-98.4   | 5.8%<br>1.6-14.2  | 97.1%<br>89.92-99.65 | 2.9%<br>0.4-10.1 | 70.8%<br>58.2-81.4 | 29.2%<br>18.6-41.8 | 97.1%<br>89.9-99.6   | 2.9%<br>0.4-10.0  | 94.2%<br>85.8-98.4   | 5.8%<br>1.6-14.2  |
| <b>I</b>        | 36                   | 6                  | 42                   | 0                 | 39                   | 3                | 23                 | 17                 | 40                   | 2                 | 39                   | 3                 |
|                 | 85.7%<br>71.5-94.6   | 14.3%<br>5.4-28.5  | 100.0%<br>91.6-100.0 | 0.0%<br>0-8.4     | 92.9%<br>80.5-98.5   | 7.1%<br>1.5-19.5 | 57.5%<br>40.9-73.0 | 42.5%<br>27.0-59.1 | 95.2%<br>83.8-99.4   | 4.8%<br>0.6-16.2  | 92.9%<br>80.5-98.5   | 7.1%<br>1.5-19.5  |
|                 | p = 0.839            |                    | p = 0.282            |                   | p = 0.428            |                  | p = 0.216          |                    | p = 0.101            |                   | p = 0.711            |                   |
| <b>C</b>        | 16                   | 2                  | 18                   | 1                 | 18                   | 0                | 10                 | 9                  | 16                   | 3                 | 16                   | 2                 |
|                 | 88.9%<br>65.3-98.6   | 11.1%<br>1.4-34.7  | 94.7%<br>74.0-99.9   | 5.3%<br>0.1-26.0  | 100.0%<br>81.5-100   | 0.0%<br>0.0-18.5 | 52.6%<br>28.9-75.6 | 47.4%<br>24.5-71.1 | 84.2%<br>60.4-96.6   | 15.8%<br>3.4-39.6 | 88.9%<br>65.3-98.6   | 11.1%<br>1.4-43.7 |
| <b>CT + T</b>   | 93                   | 18                 | 107                  | 4                 | 106                  | 5                | 69                 | 36                 | 107                  | 4                 | 104                  | 7                 |
|                 | 83.8%<br>p = 0.737   | 16.2%<br>p = 0.737 | 96.4%<br>p = 0.552   | 3.6%<br>p = 0.552 | 95.5%<br>p = 1.0     | 4.5%<br>p = 1.0  | 65.7%<br>p = 0.306 | 34.3%<br>p = 0.306 | 96.4%<br>p = 0.064   | 3.6%<br>p = 0.064 | 93.7%<br>p = 0.612   | 6.3%<br>p = 0.612 |
| ERCC1 rs3212986 |                      |                    |                      |                   |                      |                  |                    |                    |                      |                   |                      |                   |
|                 | N&V                  |                    | Diarrhoea            |                   | Stomatitis           |                  | Granulocytes       |                    | Haemaglobin          |                   | Neuro                |                   |
| <b>G</b>        | 51                   | 8                  | 59                   | 0                 | 55                   | 4                | 33                 | 22                 | 57                   | 2                 | 57                   | 2                 |
|                 | 86.4%<br>75.0-94.0   | 13.6%<br>6.0-25.0  | 100.0%<br>93.9-100   | 0.0%<br>0.0-6.0   | 93.2%<br>83.5-98.1   | 6.8%<br>1.9-16.5 | 60.0%<br>45.9-73.0 | 40.0%<br>27.0-54.1 | 96.6%<br>88.3-99.6   | 3.4%<br>0.4-11.7  | 96.6%<br>88.3-99.6   | 3.4%<br>0.4-11.7  |
| <b>GT</b>       | 50                   | 12                 | 58                   | 5                 | 61                   | 1                | 41                 | 20                 | 59                   | 4                 | 56                   | 6                 |
|                 | 80.6%<br>68.6-89.6   | 19.4%<br>10.4-31.4 | 92.1%<br>82.4-97.4   | 7.9%<br>2.6-17.6  | 98.4%<br>91.3-100.0  | 1.6%<br>0.04-8.7 | 67.2%<br>54.0-78.7 | 32.8%<br>21.3-46.0 | 93.7%<br>84.5-98.2   | 6.3%<br>1.8-15.5  | 90.3%<br>80.1-96.4   | 9.7%<br>3.6-19.9  |
| <b>I</b>        | 7                    | 0                  | 7                    | 0                 | 7                    | 0                | 5                  | 2                  | 7                    | 0                 | 6                    | 1                 |
|                 | 100.0%<br>59.0-100.0 | 0.0%<br>0.0-41.0   | 100.0%<br>59.0-100.0 | 0.0%<br>0.0-41.0  | 100.0%<br>59.0-100.0 | 0.0%<br>0.0-41.0 | 71.4%<br>29.0-96.3 | 28.6%<br>3.7-71.0  | 100.0%<br>59.0-100.0 | 0.0%<br>0.0-41.0  | 85.7%<br>42.1-99.6   | 14.3%<br>0.4-57.9 |
|                 | p = 0.438            |                    | p = 0.094            |                   | p = 0.399            |                  | p = 0.676          |                    | p = 0.773            |                   | p = 0.221            |                   |
| ERCC2 rs13181   |                      |                    |                      |                   |                      |                  |                    |                    |                      |                   |                      |                   |
|                 | N&V                  |                    | Diarrhoea            |                   | Stomatitis           |                  | Granulocytes       |                    | Haemaglobin          |                   | Neuro                |                   |
| <b>G</b>        | 19                   | 4                  | 22                   | 1                 | 22                   | 1                | 14                 | 8                  | 20                   | 3                 | 23                   | 0                 |
|                 | 82.6%<br>61.2-95.0   | 17.4%<br>5.0-38.8  | 95.7%<br>78.1-99.9   | 4.3%<br>0.1-21.9  | 95.7%<br>78.1-99.9   | 4.3%<br>0.1-21.9 | 63.6%<br>40.7-82.8 | 36.4%<br>17.2-59.3 | 87.0%<br>66.4-97.2   | 13.0%<br>2.8-33.6 | 100.0%<br>85.2-100.0 | 0.0%<br>0.0-14.8  |
| <b>GT</b>       | 50                   | 8                  | 56                   | 3                 | 56                   | 2                | 38                 | 17                 | 56                   | 3                 | 53                   | 5                 |
|                 | 86.2%<br>74.6-93.9   | 13.8%<br>6.1-25.4  | 94.9%<br>85.9-98.9   | 5.1%<br>1.1-14.1  | 96.6%<br>88.1-99.6   | 3.4%<br>0.4-11.9 | 69.1%<br>55.2-80.9 | 30.9%<br>19.1-44.8 | 94.9%<br>85.9-98.9   | 5.1%<br>1.1-14.1  | 91.4%<br>81.0-97.1   | 8.6%<br>2.9-19.0  |
| <b>I</b>        | 40                   | 8                  | 47                   | 1                 | 46                   | 2                | 27                 | 20                 | 47                   | 1                 | 44                   | 4                 |

|                      |                           |                          |                             |                         |                             |                         |                           |                           |                            |                         |                           |                          |
|----------------------|---------------------------|--------------------------|-----------------------------|-------------------------|-----------------------------|-------------------------|---------------------------|---------------------------|----------------------------|-------------------------|---------------------------|--------------------------|
|                      | <u>83.3%</u><br>69.8-92.5 | <u>16.7%</u><br>7.5-30.2 | <u>97.9%</u><br>88.9-99.9   | <u>2.1%</u><br>0.1-11.1 | <u>95.8%</u><br>85.7-99.5   | <u>4.2%</u><br>0.5-14.3 | <u>57.4%</u><br>42.2-71.7 | <u>42.6%</u><br>28.3-57.8 | <u>97.9%</u><br>88.9-99.9  | <u>2.1%</u><br>0.1-11.1 | <u>91.7%</u><br>80.0-97.7 | <u>8.3%</u><br>2.3-20.0  |
|                      | p = 0.853                 |                          | p = 0.717                   |                         | p = 1.0                     |                         | p = 0.483                 |                           | p = 0.155                  |                         | p = 0.433                 |                          |
| <b>XRCC1 rs25487</b> |                           |                          |                             |                         |                             |                         |                           |                           |                            |                         |                           |                          |
|                      | <b>N&amp;V</b>            |                          | <b>Diarrhoea</b>            |                         | <b>Stomatitis</b>           |                         | <b>Granulocytes</b>       |                           | <b>Haemaglobin</b>         |                         | <b>Neuro</b>              |                          |
|                      | <b>No</b>                 | <b>Yes</b>               | <b>No</b>                   | <b>Yes</b>              | <b>No</b>                   | <b>Yes</b>              | <b>No</b>                 | <b>Yes</b>                | <b>No</b>                  | <b>Yes</b>              | <b>No</b>                 | <b>Yes</b>               |
| <b>A</b>             | <u>17</u>                 | <u>1</u>                 | <u>18</u>                   | <u>0</u>                | <u>18</u>                   | <u>0</u>                | <u>10</u>                 | <u>8</u>                  | <u>17</u>                  | <u>1</u>                | <u>17</u>                 | <u>1</u>                 |
|                      | <u>94.4%</u><br>72.7-99.9 | <u>5.6%</u><br>0.1-27.3  | <u>100.0%</u><br>81.5-100.0 | <u>0.0%</u><br>0.0-18.5 | <u>100.0%</u><br>81.5-100.0 | <u>0.0%</u><br>0.0-18.5 | <u>55.6%</u><br>30.8-78.5 | <u>44.4%</u><br>21.5-69.2 | <u>94.4%</u><br>72.7-99.9  | <u>5.6%</u><br>0.1-27.3 | <u>94.4%</u><br>72.7-99.9 | <u>5.6%</u><br>0.1-27.3  |
| <b>AG</b>            | <u>45</u>                 | <u>10</u>                | <u>52</u>                   | <u>4</u>                | <u>51</u>                   | <u>4</u>                | <u>35</u>                 | <u>19</u>                 | <u>55</u>                  | <u>1</u>                | <u>49</u>                 | <u>6</u>                 |
|                      | <u>81.8%</u><br>69.1-90.9 | <u>18.2%</u><br>9.1-30.9 | <u>92.9%</u><br>82.7-98.0   | <u>7.1%</u><br>2.0-17.3 | <u>92.7%</u><br>82.4-98.0   | <u>7.3%</u><br>2.0-17.6 | <u>64.8%</u><br>50.6-77.3 | <u>35.2%</u><br>22.7-49.4 | <u>98.2%</u><br>90.4-100.0 | <u>1.8%</u><br>0.0-9.6  | <u>89.1%</u><br>77.8-95.9 | <u>10.9%</u><br>4.1-22.2 |
| <b>G</b>             | <u>46</u>                 | <u>9</u>                 | <u>54</u>                   | <u>1</u>                | <u>54</u>                   | <u>1</u>                | <u>34</u>                 | <u>17</u>                 | <u>51</u>                  | <u>4</u>                | <u>53</u>                 | <u>2</u>                 |
|                      | <u>83.6%</u><br>71.2-92.2 | <u>16.4%</u><br>7.8-28.8 | <u>98.2%</u><br>90.3-100.0  | <u>1.8%</u><br>0.1-9.7  | <u>98.2%</u><br>90.3-100.0  | <u>1.8%</u><br>0.05-9.7 | <u>66.7%</u><br>52.1-79.2 | <u>33.3%</u><br>20.8-47.9 | <u>92.7%</u><br>82.4-98.0  | <u>7.3%</u><br>2.0-17.6 | <u>96.4%</u><br>87.5-99.6 | <u>3.6%</u><br>0.3-8.7   |
|                      | p = 0.505                 |                          | p = 0.358                   |                         | p = 0.359                   |                         | p = 0.691                 |                           | p = 0.300                  |                         | p = 0.367                 |                          |
